# Supplementary material for: Medical-attention injuries in community cricket: a systematic review
Source: PubMed Central journal article supplement — BMJ Open Sport Exerc Med. 2020 Mar 18;6(1):e000670. doi: 10.1136/bmjsem-2019-000670 (PMC7101051; doi:10.1136/bmjsem-2019-000670), 2020-03-18
Supplement: bmjsem-2019-000670supp001.pdf [file bmjsem-2019-000670supp001.pdf]

## Medical Attention Injuries in Community Cricket: A Systematic Review

### Supplementary material

**Table S1.** Search example, SCOPUS.

| Search | Initial search to October 2017                                                                       |                                                       |         | 2 <sup>nd</sup> search from November 2017 – April 2018 |                                                       |         | 3 <sup>rd</sup> search from March 2018 to November 3 <sup>rd</sup> 2018 |                                                       |         |
|--------|------------------------------------------------------------------------------------------------------|-------------------------------------------------------|---------|--------------------------------------------------------|-------------------------------------------------------|---------|-------------------------------------------------------------------------|-------------------------------------------------------|---------|
|        | Terms                                                                                                | Limiters                                              | Results | Terms                                                  | Limiters                                              | Results | Terms                                                                   | Limiters                                              | Results |
| S1     | (TITLE-ABS-KEY (cricket*) AND TITLE-ABS-KEY (injur*))                                                | -                                                     | 357     | (TITLE-ABS-KEY (cricket*) AND TITLE-ABS-KEY (injur*))  | Date range 2017 to present                            | 43      | (TITLE-ABS-KEY (cricket*) AND TITLE-ABS-KEY (injur*))                   | Date range 2018 to present                            | 30      |
| S2     | (TITLE-ABS-KEY (cricket* OR cricketing or cricket) AND TITLE-ABS-KEY (injur* OR injury OR injuries)) | -                                                     | 357     |                                                        |                                                       |         |                                                                         |                                                       |         |
|        |                                                                                                      | Overall results retrieved from 1 <sup>st</sup> search | 357     |                                                        | Overall results retrieved from 2 <sup>nd</sup> search | 43      |                                                                         | Overall results retrieved from 3 <sup>rd</sup> search | 30      |

**Table S2.** Reasons for exclusion of medical attention articles

|    | First author    | Title                                                                                                              | Year | Study Type | Data Type | Cricket Only | Reasons for exclusion                                                    |
|----|-----------------|--------------------------------------------------------------------------------------------------------------------|------|------------|-----------|--------------|--------------------------------------------------------------------------|
| 1  | Aburn, N.       | Eye injuries in indoor cricket at Wellington Hospital: a survey January 1987 to June 1989.                         | 1990 | CS         | H         | Y            | single body location                                                     |
| 2  | Andarbi, A.     | Cranioplasty: Indications, procedures, and outcome - An institutional experience                                   | 2017 | C-S        | H         | N            | single body location                                                     |
| 3  | Antoun, J. S.   | Sports-Related Maxillofacial Fractures Over an 11-Year Period                                                      | 2008 | CS         | H         | N            | single body location                                                     |
| 4  | Cassell, E. P.  | Epidemiology of medically treated sport and active recreation injuries in the Latrobe Valley, Victoria, Australia  | 2003 | CS         | H         | N            | rates only for cricket - injury location & nature numbers for all sports |
| 5  | Crompton, B.    | A survey of sports injuries in Birmingham                                                                          | 1977 | CS         | H         | N            | 30 + years old                                                           |
| 6  | Driscoll, T. R. | Heat-related injuries resulting in hospitalisation in Australian sport                                             | 2008 | CS         | H         | N            | single injury nature                                                     |
| 7  | Fernando, T.    | Sports injuries in Victoria, 2012-13 to 2014-15: evidence from emergency department records                        | 2018 | CS         | H         | N            | rates and numbers only                                                   |
| 8  | Finch, C. F.    | The public health impact of injury during sport and active recreation                                              | 2006 | C-S        | TS        | N            | rates and numbers only                                                   |
| 9  | Finch, C. F.    | The descriptive epidemiology of sports/leisure-related heat illness hospitalisations in New South Wales, Australia | 2008 | CS         | H         | N            | single injury nature                                                     |
| 10 | Finch, C.F.     | A comparison of two sports injury surveillance systems within sports medicine clinics                              | 2002 | CS         | SMC       | N            | rates and numbers only                                                   |

|    | First author      | Title                                                                                                                                                                                        | Year | Study Type | Data Type | Cricket Only | Reasons for exclusion                                                 |
|----|-------------------|----------------------------------------------------------------------------------------------------------------------------------------------------------------------------------------------|------|------------|-----------|--------------|-----------------------------------------------------------------------|
| 11 | Finch, C.F.       | Increasing incidence of hospitalisation for sport related concussion in Victoria, Australia                                                                                                  | 2013 | CS         | H         | N            | single injury nature                                                  |
| 12 | Fong, L.P.        | Sports-related eye injuries                                                                                                                                                                  | 1994 | CS         | H         | N            | single body location                                                  |
| 13 | Gregory, P. T.    | Sussex eye hospital sports injuries                                                                                                                                                          | 1986 | CS         | H         | N            | 30 + years old, also single body location                             |
| 14 | Hill, C. M.       | Dental and facial injuries following sports accidents: A study of 130 patients                                                                                                               | 1985 | CS         | H/C       | N            | 30 + years old, also single body location                             |
| 15 | Hill, C. M.       | A one year review of maxillofacial sports injuries treated at an accident and emergency department                                                                                           | 1998 | CS         | H/C       | N            | single body location                                                  |
| 16 | Hume, P. A.       | Sports injuries in New Zealand: Exploratory Analyses                                                                                                                                         | 1994 | CS         | H//C      | N            | rates and numbers only - body location & injury nature for all sports |
| 17 | Jagger, R. G.     | A pilot study of the prevalence of orofacial and head injuries in schoolboy cricketers at eight private schools in England and Australia.                                                    | 2009 | C-S        | SRQ       | Y            | single body location                                                  |
| 18 | Jago, D.          | A survey of sporting and recreational injuries presenting to a general practice                                                                                                              | 1998 | C-S        | GP        | N            | numbers only                                                          |
| 19 | Lee, K.           | Cricket related maxillofacial fractures                                                                                                                                                      | 2012 | CS         | H         | Y            | single body location                                                  |
| 20 | Lim, L. H.        | Sports related facial fractures: a review of 137 patients                                                                                                                                    | 1993 | CS         | H         | N            | single body location                                                  |
| 21 | Littlewood, K. R. | Blunt ocular trauma and hyphaemia                                                                                                                                                            | 1982 | CS         | H         | N            | 30 + years, also single body location                                 |
| 22 | Lock, J.          | A study of sports-related orbital fractures in Singapore                                                                                                                                     | 2017 | C-S        | H         | N            | single body location                                                  |
| 23 | Love, R. M.       | Sport-related dental injury claims to the New Zealand Accident Rehabilitation & Compensation Insurance Corporation, 1993-1996: analysis of the 10 most common sports, excluding rugby union. | 1998 | CS         | I         | N            | single body location                                                  |
| 24 | Macewen, C. J.    | Sport associated eye injury: a casualty department survey                                                                                                                                    | 1987 | CS         | H         | N            | single body location                                                  |
| 25 | Maladiere, E.     | Aetiology and incidence of facial fractures sustained during sports: A prospective study of 140 patients                                                                                     | 2001 | CS         | H         | N            | single body location                                                  |
| 26 | Mummery, W. K.    | The epidemiology of medically attended sport and recreational injuries in Queensland                                                                                                         | 2002 | C-S        | QI        | N            | rates and numbers only - body location for all sports                 |
| 27 | Nicholl, J. P.    | The epidemiology of sports and exercise related injury in the United Kingdom                                                                                                                 | 1995 | C-S        | SRQ       | N            | numbers only, incomplete mechanism                                    |
| 28 | Owoeye, O. B. A.  | Pattern and management of sports injuries presented by Lagos state athletes at the 16th National Sports Festival (KADA games 2009) in Nigeria                                                | 2010 | PC         | PDC       | N            | rates and numbers only - body location & injury nature for all sports |
| 29 | Rowell, S.        | Injuries treated at a sports injury clinic compared with a neighbouring accident and emergency department                                                                                    | 1988 | CS         | H         | N            | numbers only - injury nature for all sports                           |

|    | First author      | Title                                                                                                                              | Year | Study Type | Data Type | Cricket Only | Reasons for exclusion                                            |
|----|-------------------|------------------------------------------------------------------------------------------------------------------------------------|------|------------|-----------|--------------|------------------------------------------------------------------|
| 30 | Russell, J. H. B. | The pattern of hand injuries in amateur cricket                                                                                    | 2014 | CS         | C         | Y            | single body location                                             |
| 31 | Sadleir, L. G.    | Indoor cricket finger injuries                                                                                                     | 1990 | CS         | H//C      | Y            | single body location                                             |
| 32 | Wang, H.          | Age, gender, and etiology differences of sports-related fractures in children and adolescents: A retrospective observational study | 2019 | CS         | H         | N            | single injury nature                                             |
| 33 | Watters, D. A. K. | Sports injuries in an accident and emergency department                                                                            | 1984 | CS         | H         | N            | 30 + years old - body locations and injury nature for all sports |
| 34 | Weightman, D.     | Injuries in eleven selected sports                                                                                                 | 1975 | C-S        | SRQ       | N            | 30 + years - minimal mechanism                                   |
| 35 | Welch, C.L.       | ACC claims for sports-related dental trauma from 1999 to 2008: A retrospective analysis                                            | 2010 | CS         | I         | N            | single body location                                             |

CS = Case Series, C-S = Cross-sectional, PC = Prospective Cohort, H = Hospital data, QI = Questionnaire/Interview, SRQ = Self-Reported Questionnaire/logbook, I = Insurance data, C = Clinical data, SMC = Sports Medicine Centre/Clinic, GP = General Practitioner/doctor, PDC = Primary Data Collector, TS = Telephone Survey
